# Supplementary material for: Regioselective glucosylation of (+)-catechin using a new variant of sucrose phosphorylase from Bifidobacterium adolescentis
Source: Royal Society of Chemistry journal article supplement (doi:10.1039/d3ob00191a), 2023-01-01

**A**

L CF SF NRF WF<sub>1</sub> WF<sub>2</sub> EF<sub>0</sub> EF<sub>1</sub> EF<sub>2</sub> EF<sub>3</sub>

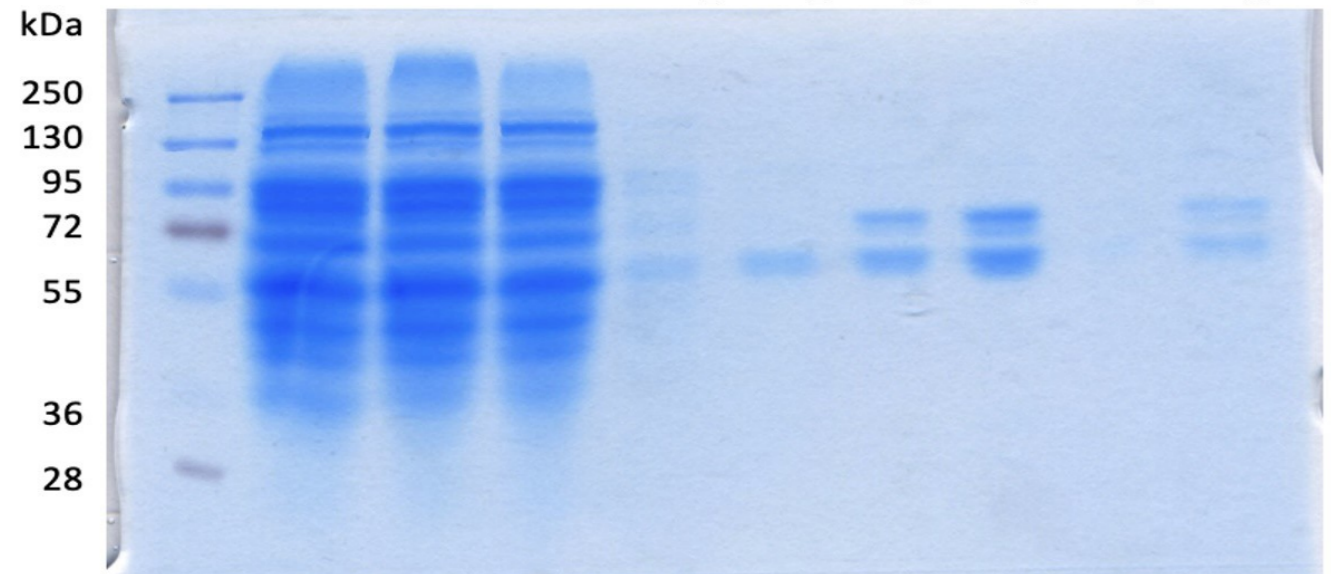

**B**

CF L SF NRF WF<sub>1</sub> WF<sub>2</sub> EF<sub>0</sub> EF<sub>1</sub> EF<sub>2</sub> EF<sub>3</sub>

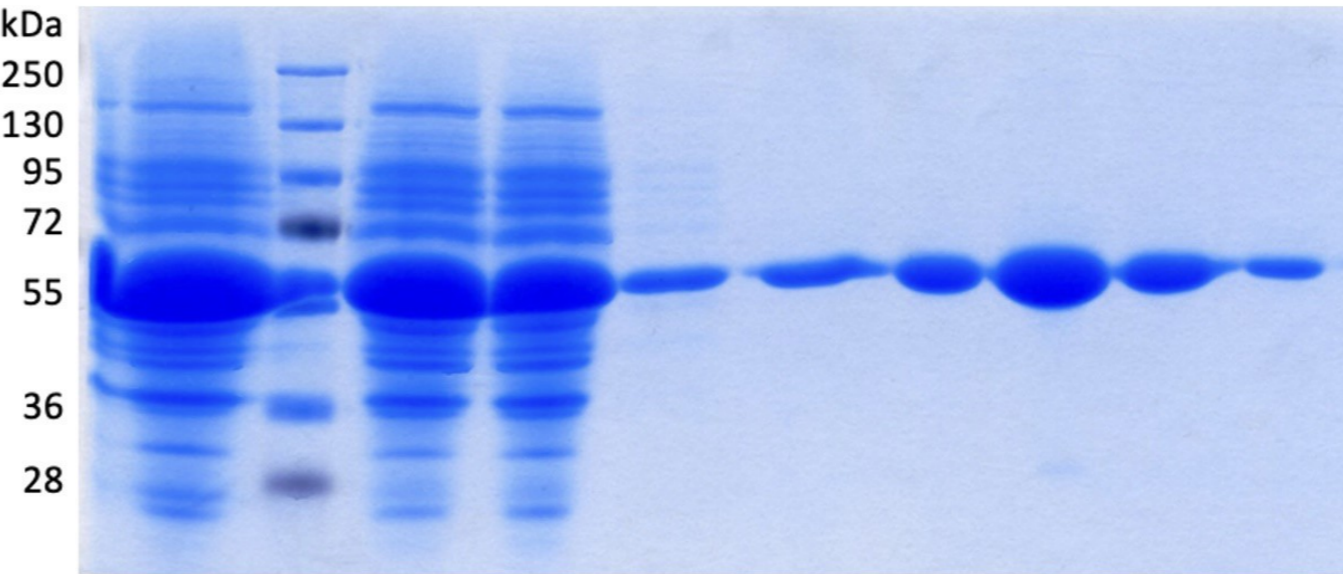

Supplement: d3ob00191a1.pdf [file d3ob00191a1.pdf]
