# Supplementary figures and images for: Regioselective glucosylation of (+)-catechin using a new variant of sucrose phosphorylase from Bifidobacterium adolescentis
Source: Royal Society of Chemistry journal article supplement (doi:10.1039/d3ob00191a), 2023-01-01

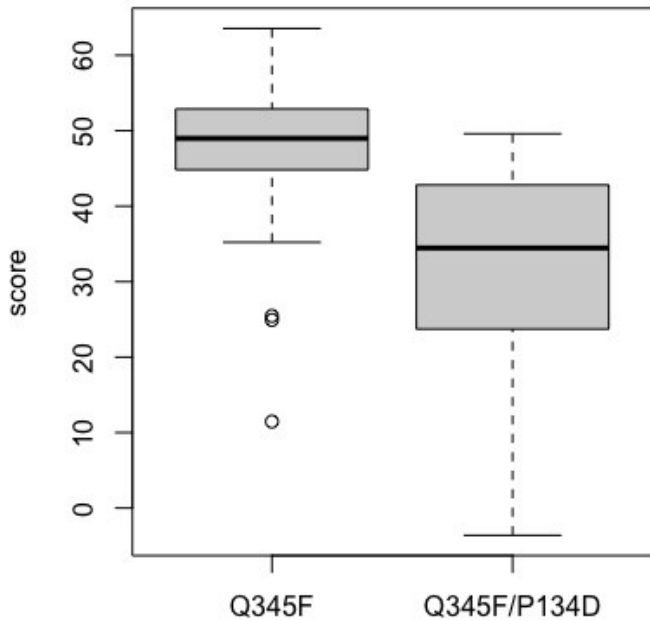

Supplement: d3ob00191a2.pdf [file d3ob00191a2.pdf]

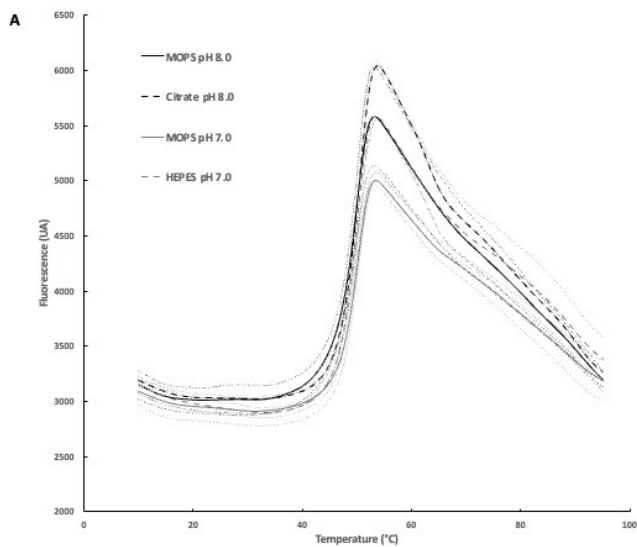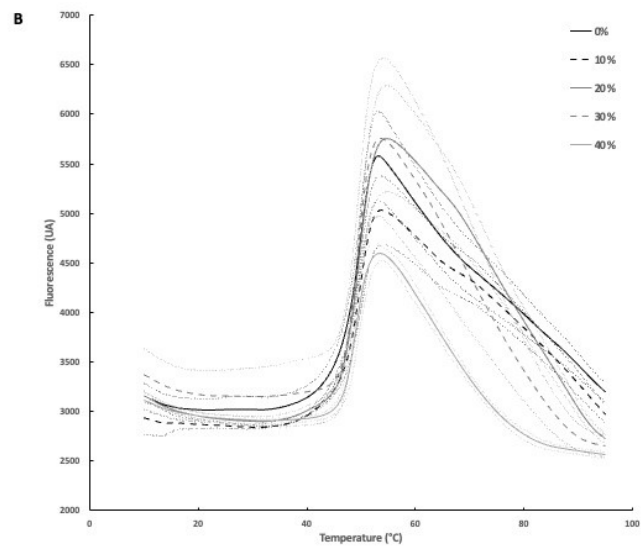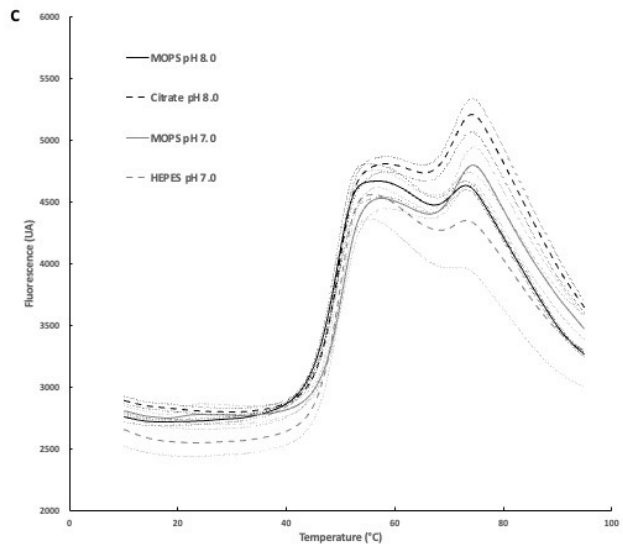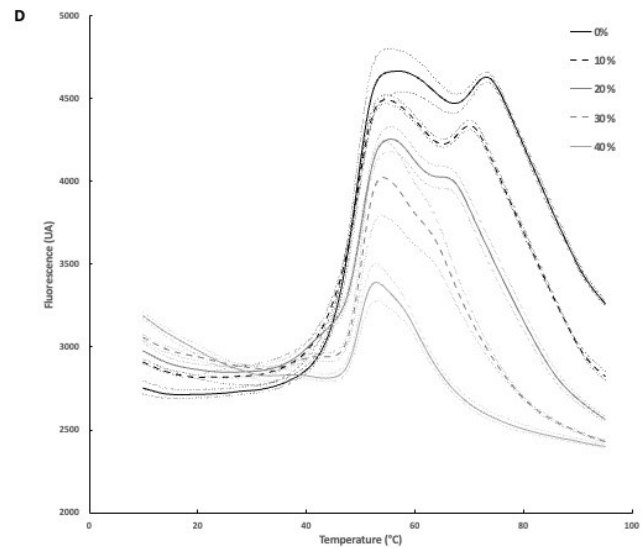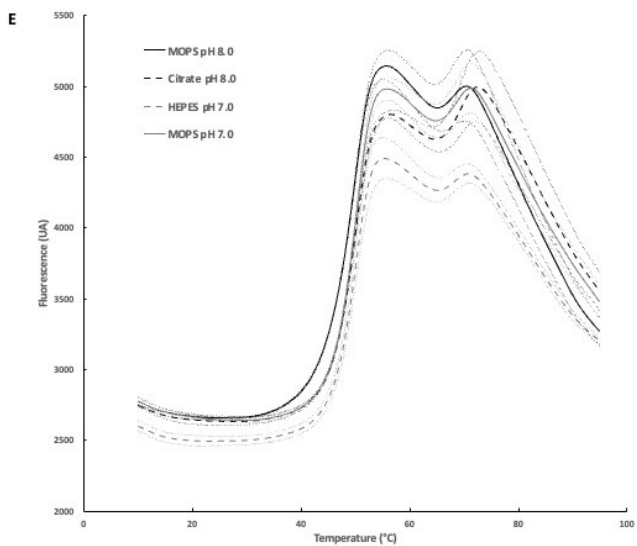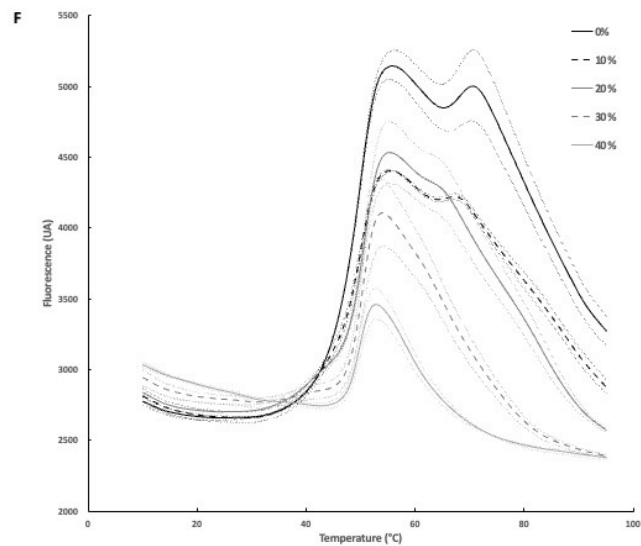

Supplement: d3ob00191a3.pdf [file d3ob00191a3.pdf]

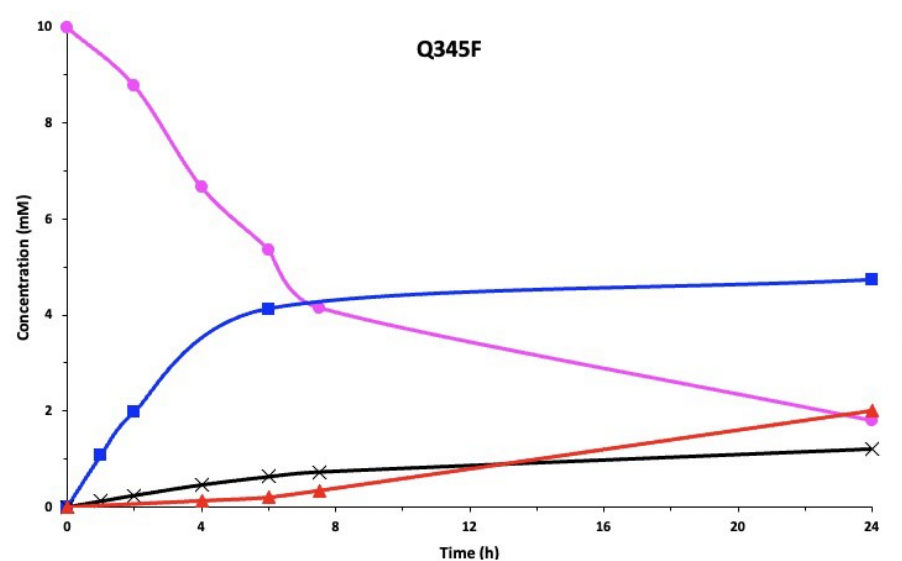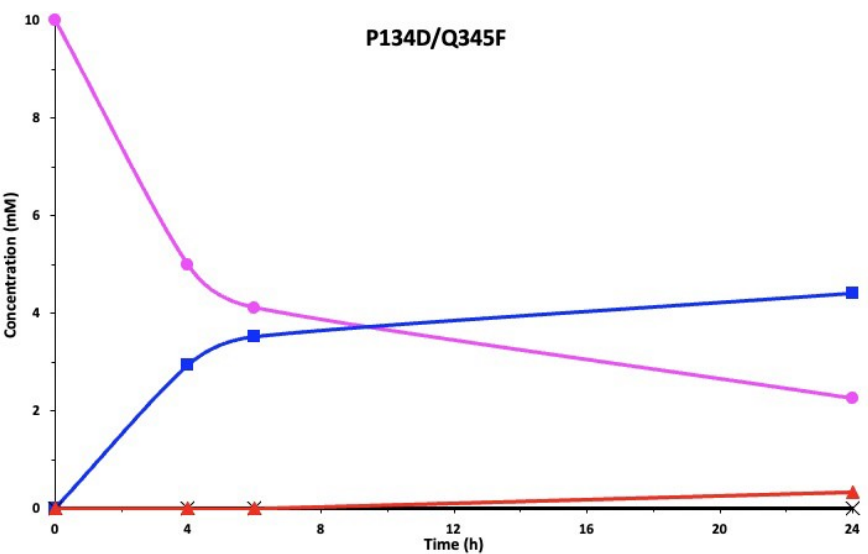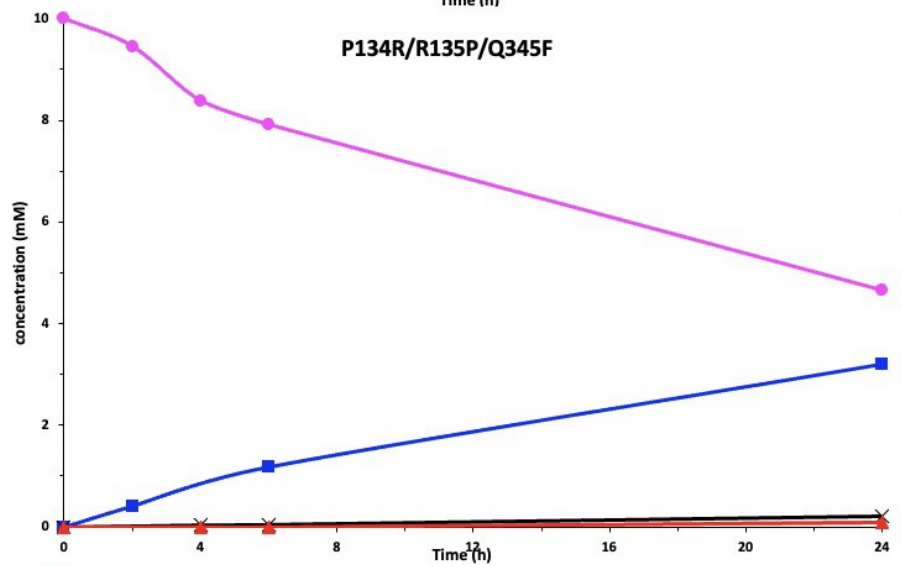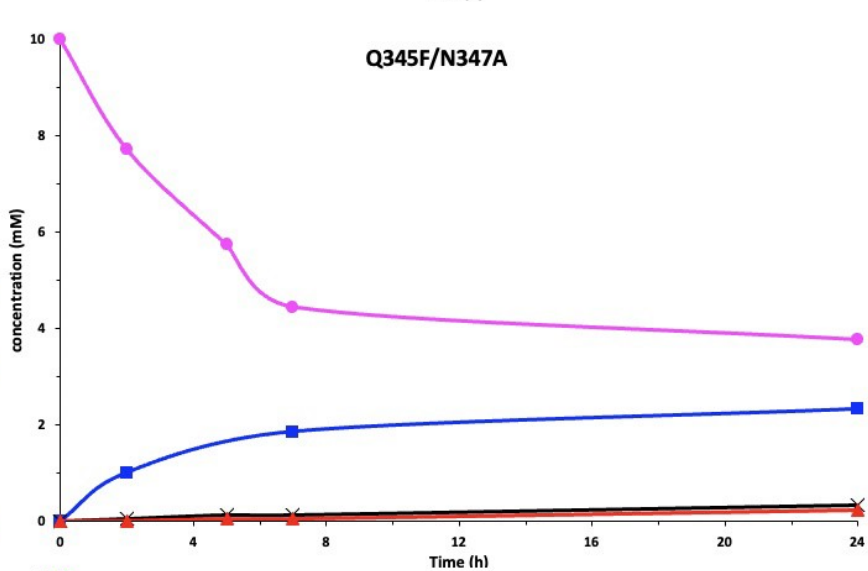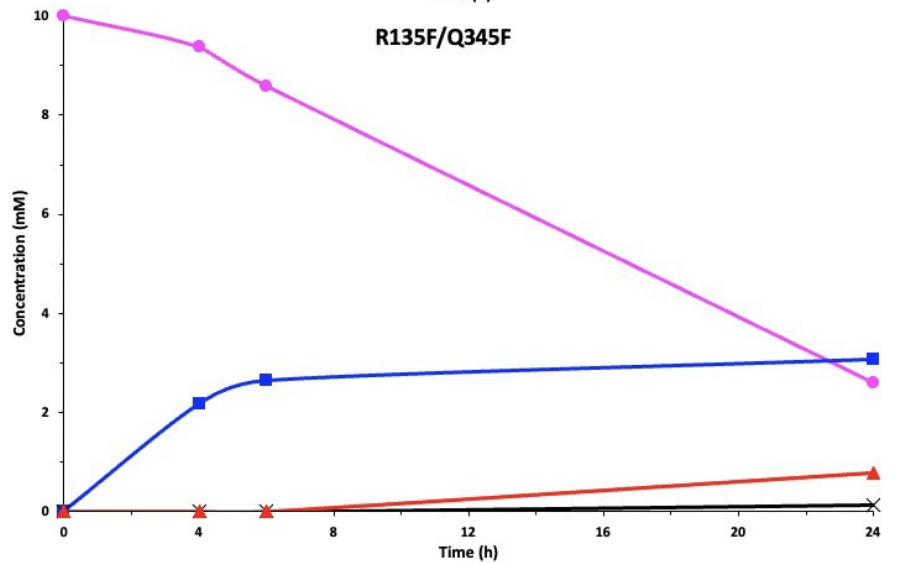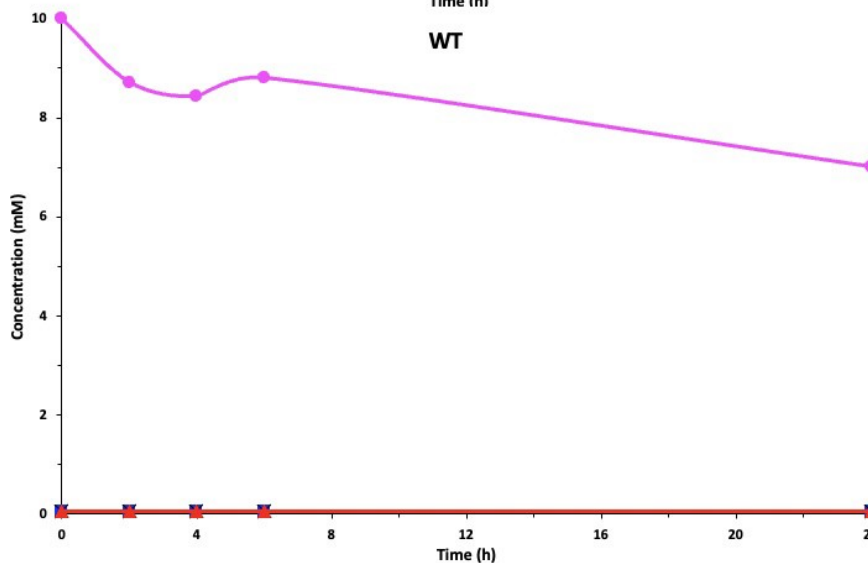

Supplement: d3ob00191a5.pdf [file d3ob00191a5.pdf]

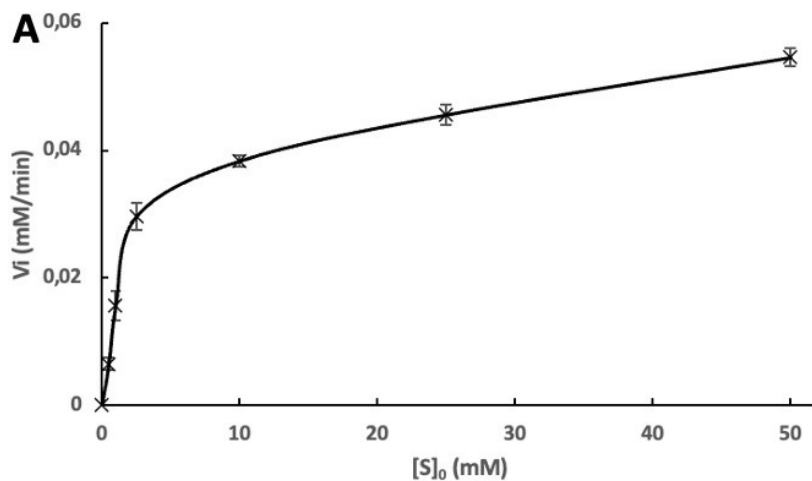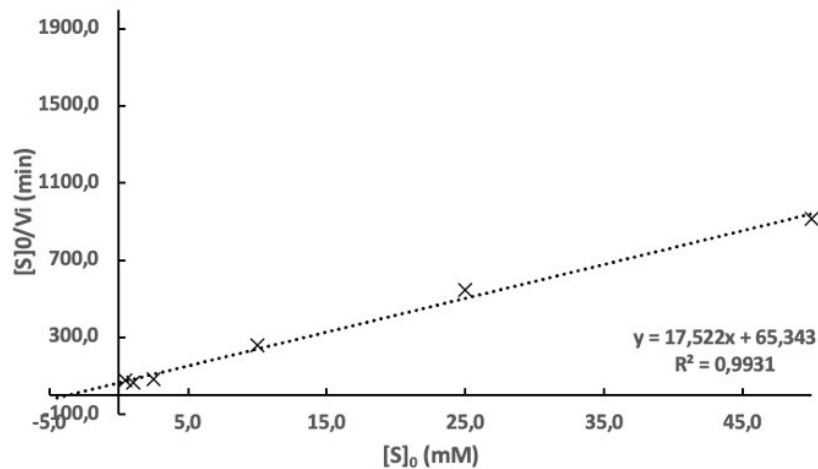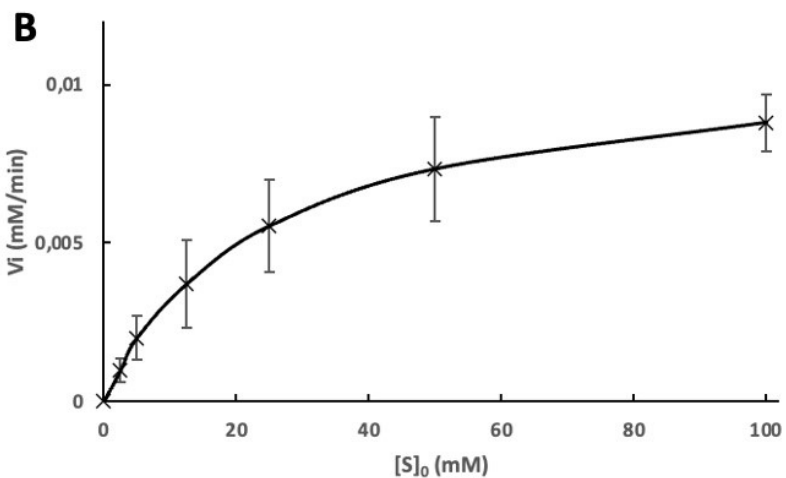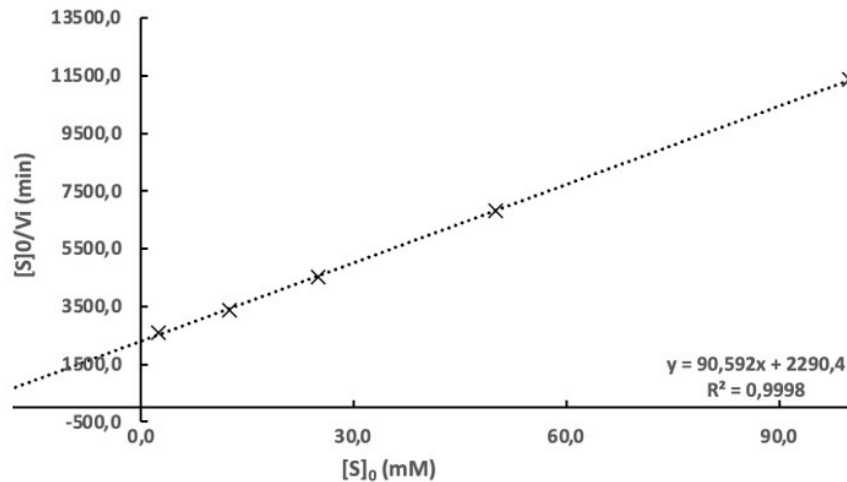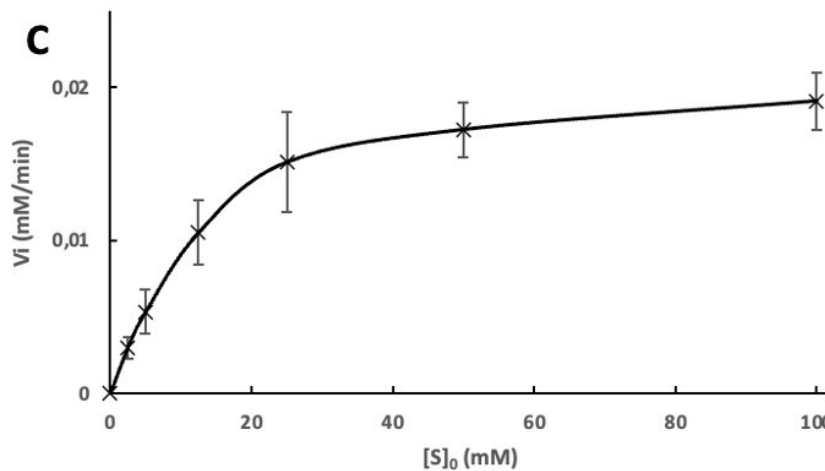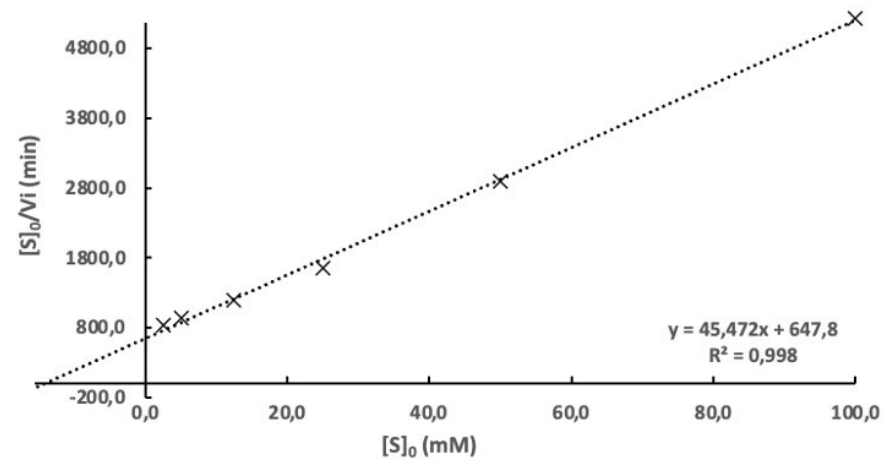

Supplement: d3ob00191a6.pdf [file d3ob00191a6.pdf]

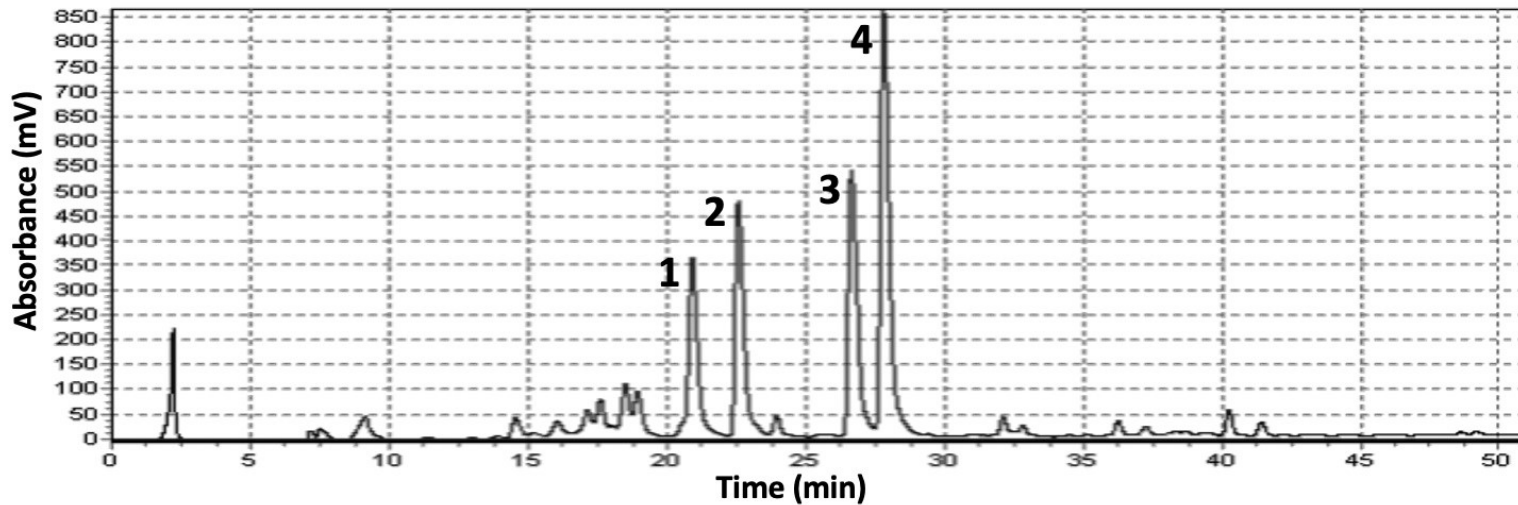

Supplement: d3ob00191a7.pdf [file d3ob00191a7.pdf]
